RESEARCH ARTICLE

# Feasibility of laparoscopic gastrectomy for patients with Siewert-type II/III adenocarcinoma of the esophagogastric junction: A propensity score matching analysis

Yinan Shi<sup>1</sup>✉, Linjie Li<sup>1</sup>✉, Huashi Xiao<sup>2,3</sup>✉, Shanshan Guo<sup>2,3</sup>, Guiping Wang<sup>2,3</sup>, Kai Tao<sup>1</sup>, Jianhong Dong<sup>1</sup>\*, Liang Zong<sup>2</sup>\*

**1** Department of minimal invasive gastrointestinal surgery, Shanxi Cancer Hospital, affiliated to Shanxi Medical University, Taiyuan, Shanxi, PR. China, **2** Department of Gastrointestinal Surgery, Clinical Medical School of Yangzhou university, Northern Jiangsu People's Hospital, Yangzhou, Jiangsu, PR. China, **3** Clinical Medical College, Dalian Medical University, Liaoning, PR. China

✉ These authors contributed equally to this work.

\* [asdjh666@163.com](mailto:asdjh666@163.com) (JD); [250537471@qq.com](mailto:250537471@qq.com) (LZ)

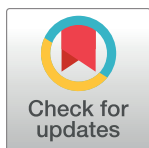

## Abstract

### Background/Aim

The feasibility of using laparoscopic gastrectomy for the treatment of Siewert-type II/III adenocarcinoma of the esophagogastric junction (AEG) has not been addressed. This study aimed to comparatively evaluate the short- and long-term effects on laparoscopic versus open surgery using (propensity score matching) PSM for Siewert-type II/III AEG.

### Methods

We retrospectively collected data from the patients with Siewert-type II/III AEG who were treated in our cancer center between January 2013 and December 2015. Patients undergoing laparoscopic gastrectomy and open gastrectomy were matched via PSM. The cumulative 2-year Overall survival (OS) rate of patients in the two cohorts was estimated by Kaplan-Meier plots. Multi-variable analysis using a Cox regression model was conducted to identify independent risk factors.

### Results

A total of 963 patients with Siewert-type II/III AEG were included, of which 132 cases were in the laparoscopic gastrectomy group, and 831 cases were in the open gastrectomy group. After regrouping with PSM, 132 patients in the laparoscopic gastrectomy group were balanced with 264 similar patients in the open gastrectomy group. As expected, the laparoscopic gastrectomy group had significantly longer operation times, but less blood loss. Furthermore, the two groups showed similar results for post-operative complications, duration of hospital stay and 2-year OS rate. Combined organ resection was an independent risk factor for 2-year OS rate.

## OPEN ACCESS

**Citation:** Shi Y, Li L, Xiao H, Guo S, Wang G, Tao K, et al. (2018) Feasibility of laparoscopic gastrectomy for patients with Siewert-type II/III adenocarcinoma of the esophagogastric junction: A propensity score matching analysis. PLoS ONE 13 (9): e0203125. <https://doi.org/10.1371/journal.pone.0203125>

**Editor:** Masaru Katoh, National Cancer Center, JAPAN

**Received:** March 22, 2018

**Accepted:** August 15, 2018

**Published:** September 26, 2018

**Copyright:** © 2018 Shi et al. This is an open access article distributed under the terms of the [Creative Commons Attribution License](https://creativecommons.org/licenses/by/4.0/), which permits unrestricted use, distribution, and reproduction in any medium, provided the original author and source are credited.

**Data Availability Statement:** All relevant data are within the paper and its Supporting Information files.

**Funding:** The authors received no specific funding for this work.

**Competing interests:** The authors have declared that no competing interests exist.

## Conclusion

This study suggests that laparoscopic gastrectomy may serve as a safe and feasible treatment for Siewert-type II/III AEG and achieve similar oncologic outcomes as open gastrectomy.

## Introduction

Gastric cancer is the fourth most common malignant tumor in the world [1]. According to previous research, Siewert-type II/III AEG spreads rapidly, has a bad prognosis, and is mainly treated as proximal gastric cancer [2–3]. Surgical resection with a D2 lymphadenectomy is the major form of treatment for proximal gastric cancer [4]. Open gastrectomy plays a pivotal role in treating both early and advanced gastric cancers [5]. With the development of minimally invasive surgery, the number of laparoscopic gastrectomy procedures has increased in recent years [6]. However, whether laparoscopic gastrectomy should be the standard method for treating Siewert-type II/III AEG is still controversial.

There are several technical difficulties involved with laparoscopic gastrectomy for AEG, including sufficient lymph node dissection, complex structures of vasculature, and combined resection of other organs. Due to these difficulties, only a limited number of surgeons choose to perform laparoscopic gastrectomy. However, some researchers have reported that laparoscopic gastrectomy resulted in better short-term outcomes for treating early-stage Siewert-type II/III AEG [7]. Further research is needed to clarify the safety and feasibility of using laparoscopic surgery to treat advanced AEG, as well as the long-term outcomes for both early and advanced AEG. In this study, we aimed to examine the short- and long-term effects of using laparoscopic surgery to treat patients with Siewert-type II/III AEG, compared to the open surgery method using PSM.

## Patients and methods

### Ethics statement

The study was approved by ethics committee of Shanxi Cancer Hospital before it began. All participants signed a written informed consent. All data has been anonymized and de-identified.

### Patients

From January 2013 to December 2015, we retrospectively reviewed patients diagnosed with Siewert-type II/III AEG who were treated with open gastrectomy or laparoscopic gastrectomy at the Shanxi Cancer Hospital in China. The inclusion criteria were as follows: 1) histologically confirmed Siewert-type II/III AEG; 2) open or laparoscopic approaches with total or proximal gastrectomy; 3) primary R0 resection; 4) esophageal invasion < 3cm; 5) tumor size < 4cm; 6) transabdominal approaches; 7) no distal metastasis; 8) complete and accessible medical records. The exclusion criteria included: 1) multiple malignancies; 2) post-operative residual cancer (R1/R2 resection); 3) endoscopic resection for early gastric cancer; 4) use of transthoracic surgical approaches; 5) loss of follow-up data within two years. A total of 963 patients were enrolled in the study (laparoscopic group = 132, open group = 831). There is no established guideline to state an absolute indication regarding laparoscopic approach for Siewert-type II/III AEG. A widely accepted indication for laparoscopic approach was related to tumor size and

surgical history, to achieve R0 resection. The attending surgeon determined the laparoscopic approach mainly depending on a history without surgery because of a fixed tumor size for two groups. Meanwhile, the possible complications as well as advantages and disadvantages of the 2 gastrectomy methods were informed to patients and their families. All patients received a gastrectomy with D2 lymphadenectomy in accordance with the Japanese gastric cancer guidelines [5]. Six to eight cycles of adjuvant chemotherapy were administered to those patients who were in an advanced stage beyond the T2 stage or who had lymph-node metastasis in any T stage. After the surgery, patient follow-up was every 3 months for the following three years.

Recorded clinical characteristics of the patients included: age, gender, body mass index, smoking/drinking history, past medical history, ECOG score, UICC stage, administration of neoadjuvant chemotherapy, surgical approach, duration of operation, number of lymph nodes harvested, combined resection of other organs, the type of gastrointestinal tract reconstruction (Roux-en-Y, Esophagogastrostomy, jejunum interposition / antrum-preserving single tract reconstruction), amount of blood lost during the operation, post-operation complications (anastomosis leakage, empyema, Intra-abdominal abscess, pneumonia), and duration of hospitalization.

### Data extraction and statistics

Propensity score matching analyses were used to minimize intergroup disparities and control for selection bias. Multivariable logistic regression was performed on both laparoscopic and open group using all variables with possible influence on the patients' survival. Variables included in the multivariable logistic regression include gender, age, height, bodyweight, body mass index, smoking/drinking history, cardiovascular disease, diabetes, ECOG score, UICC stage, operation time, loss of blood, lymph node dissection number, combined organ resection, reconstruction type, post-operation complications, and hospital stay. A propensity score was then estimated for all subjects using this logistic regression, and open group patients were matched to laparoscopic group patients using the nearest neighbor matching within a caliper of 0.15 times the standard deviation of the propensity score. Prognostic factors and survival were estimated by the uni- and multivariable Cox proportional hazards model. The multivariable model was selected using the backward variable elimination technique with an elimination criterion of  $p$  value  $<0.05$ .

## Results

### Clinico-pathological characteristics of patients

A total of 132 patients were enrolled in the laparoscopic group, and 831 patients were enrolled in the open group. Baseline characteristics and clinical features of the participants are presented in [Table 1](#). The two groups were comparable in terms of age, gender, body mass index, smoking/drinking history, past medical history, ECOG score, UICC stage, administration of neoadjuvant chemotherapy, number of lymph-nodes harvested, combined resection of other organs, blood lost during the operation, duration of hospitalization, and post-operation complications, including anastomosis leakage, empyema, and intra-abdominal abscess. Before PSM, the laparoscopic group had significantly longer operation times, a lower proportion of post-operation pneumonia, and different reconstruction types. Therefore, these factors were used as matching factors. The PSM technique matched 132 patients in the laparoscopic group to 264 open gastrectomy patients. After PSM, the laparoscopic group showed significantly longer operation times, less blood loss during surgery and a lower frequency of combined organ resection.

Table 1. Clinicopathological characteristics for patients in two cohorts before and after propensity score matching.

|                                     | Before propensity score matching |                       |       | After propensity score matching |                       |       |
|-------------------------------------|----------------------------------|-----------------------|-------|---------------------------------|-----------------------|-------|
|                                     | Laparoscopic group<br>N = 132    | Open group<br>N = 831 | P     | Laparoscopic group<br>N = 132   | Open group<br>N = 264 | P     |
| <b>Gender</b>                       |                                  |                       | 0.648 |                                 |                       | 1.000 |
| Male                                | 114(86.4%)                       | 705(84.8%)            |       | 114(86.4%)                      | 228(86.4%)            |       |
| female                              | 18(13.6%)                        | 126(15.2%)            |       | 18(13.6%)                       | 36(13.6%)             |       |
| <b>Age</b>                          | 61(37.79)                        | 62(28,87)             | 0.083 | 60.08±8.37                      | 60.54±9.06            | 0.588 |
| <b>Height</b>                       | 167(150,182)                     | 167(144,188)          | 0.912 | 167(150,182)                    | 168(147,182)          | 0.300 |
| <b>Body weight</b>                  | 63(44,94)                        | 63(38,102)            | 0.716 | 63(44,94)                       | 65(38,97)             | 0.371 |
| <b>Body Mass Index</b>              | 23(17.19,33.78)                  | 22.95(14.68,35.36)    | 0.915 | 23.13±3.09                      | 23.29±3.27            | 0.463 |
| <b>Loss of body weight</b>          |                                  |                       | 0.842 |                                 |                       | 0.489 |
| <10%                                | 120(90.9%)                       | 750(90.4%)            |       | 120(90.9%)                      | 234(88.6%)            |       |
| ≥10%                                | 12(9.1%)                         | 80(9.6%)              |       | 12(9.1%)                        | 30(11.4%)             |       |
| <b>Smoking history</b>              | 68(51.5%)                        | 387(46.6%)            | 0.290 | 68(51.5%)                       | 112(42.4%)            | 0.087 |
| <b>Drinking history</b>             | 33(25.0%)                        | 181(21.8%)            | 0.409 | 33(25.0%)                       | 58(22.0%)             | 0.499 |
| <b>Cardiovascular Disease</b>       | 2(1.5%)                          | 32(3.9%)              | 0.273 | 2(1.5%)                         | 15(5.7%)              | 0.054 |
| <b>Diabetes</b>                     | 10(7.6%)                         | 72(8.7%)              | 0.677 | 10(7.6%)                        | 21(8.0%)              | 0.895 |
| <b>ECOG score</b>                   |                                  |                       | 0.129 |                                 |                       | 0.438 |
| ≤2                                  | 119(90.2%)                       | 708(85.2%)            |       | 119(90.2%)                      | 231(87.5%)            |       |
| >2                                  | 13(9.8%)                         | 123(14.8%)            |       | 13(9.8%)                        | 33(12.5%)             |       |
| <b>Neo-adjuvant chemotherapy</b>    | 3(2.3%)                          | 16(1.9%)              | 1.000 | 3(2.3%)                         | 6(2.3%)               | 1.000 |
| <b>UICC stage</b>                   |                                  |                       | 0.614 |                                 |                       | 0.125 |
| I                                   | 28(21.2%)                        | 93(11.2%)             |       | 28(21.2%)                       | 40(15.2%)             |       |
| II                                  | 50(37.7%)                        | 309(37.2%)            |       | 50(37.7%)                       | 103(39.0%)            |       |
| III                                 | 54(40.9%)                        | 429(51.6%)            |       | 54(40.9%)                       | 121(45.8%)            |       |
| <b>Operation time (min)</b>         | 210(80,360)                      | 160(60,460)           | 0.000 | 210(80,360)                     | 180(120,460)          | 0.001 |
| <b>Loss of blood (ml)</b>           | 100(20,1000)                     | 100(10,3000)          | 0.185 | 100(20,1000)                    | 150(10,3000)          | 0.018 |
| <b>lymph node dissection number</b> | 19(3,54)                         | 19(1,67)              | 0.485 | 19(3,54)                        | 20(2,62)              | 0.055 |
| <b>Combined organ resection</b>     | 11(8.3%)                         | 105(12.6%)            | 0.158 | 11(8.3%)                        | 50(18.9%)             | 0.006 |
| <b>Reconstruction type</b>          |                                  |                       | 0.000 |                                 |                       | 1.000 |
| Roux-en-Y                           | 112(84.8%)                       | 536(64.6%)            |       | 112(84.8%)                      | 223(84.8%)            |       |
| Esophagogastrostomy                 | 20(15.2%)                        | 269(32.4%)            |       | 20(15.2%)                       | 40(15.2%)             |       |
| Jejunum interposition               | 0                                | 25(3.0%)              |       | 0                               | 0                     |       |
| <b>Post-operation complications</b> |                                  |                       |       |                                 |                       |       |
| <b>Anastomotic leakage</b>          | 5(3.8%)                          | 31(3.7%)              | 1.000 | 5(3.8%)                         | 12(4.5%)              | 0.726 |
| <b>Empyema</b>                      | 2(1.5%)                          | 8(1.0%)               | 0.905 | 2(1.5%)                         | 4(1.5%)               | 1.000 |
| <b>Abdominal abscess</b>            | 4(3.0%)                          | 25(3.0%)              | 1.000 | 4(3.0%)                         | 8(3.0%)               | 1.000 |
| <b>Pneumonia</b>                    | 2(1.5%)                          | 49(5.9%)              | 0.037 | 2(1.5%)                         | 6(2.3%)               | 0.900 |
| <b>Hospital stay</b>                | 24(13,84)                        | 24(8,233)             | 0.716 | 24(13,84)                       | 26(15,132)            | 0.109 |
| <b>OS rate (2 years)</b>            | 118(89%)                         | 723(87%)              | 0.532 | 118(89%)                        | 225(85%)              | 0.249 |

<https://doi.org/10.1371/journal.pone.0203125.t001>

### Surgical approaches and post-operation complications

The laparoscopic group required a significantly longer surgery duration compared with open gastrectomy, despite using PSM. However, there was a tendency for patients in the open group to lose a larger amount of blood during the operations. Patients having jejunum interposition/ antrum-preserving single tract reconstruction were administered only with open gastrectomy. Additionally, combined resection of other organs was more prevalent in the open group. After

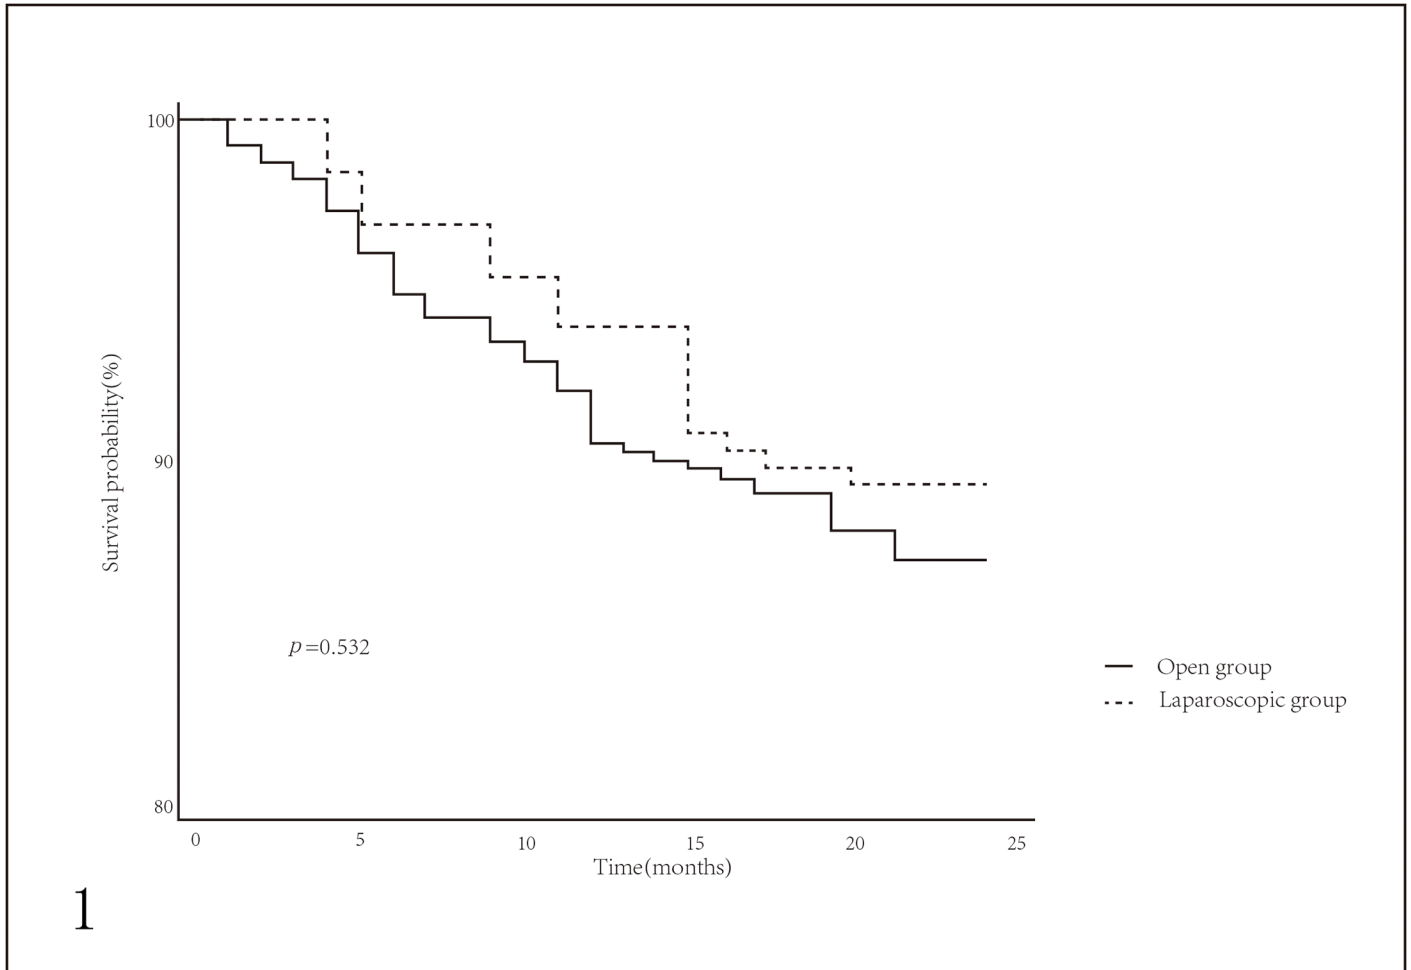

**Fig 1. Two-year overall survival (OS) probability of patients in open group and laparoscopic group before propensity score matching.**

<https://doi.org/10.1371/journal.pone.0203125.g001>

PSM, there were no significant differences between the two groups for post-operation complications and duration of hospital stay.

### Overall survival (OS) rate and prognostic factors

The follow-up ranges from 4 to 49 months. The two-year overall survival (OS) were 89% in 118 laparoscopic patients, 87% in 732 unmatched open patients and 85% in 225 matched open patients. However, there were no significant differences for two-year OS between the two groups, neither in the unmatched cohort nor the matched cohort (Figs 1 and 2). Cox regression model revealed the results of the univariate and multivariate analyses. In unmatched cohort, post-operation pneumonia, UICC stage and combined organ resection were significantly associated with two-year OS in univariate analysis, while post-operation pneumonia and combined organ resection were independent predictors for two-year OS in multivariate analysis (Table 2). In matched cohort, UICC stage and combined organ resection were significantly associated with OS in univariate analyses after PSM, whereas combined organ resection was the only independent predictor for OS in multivariate analysis (Table 3).

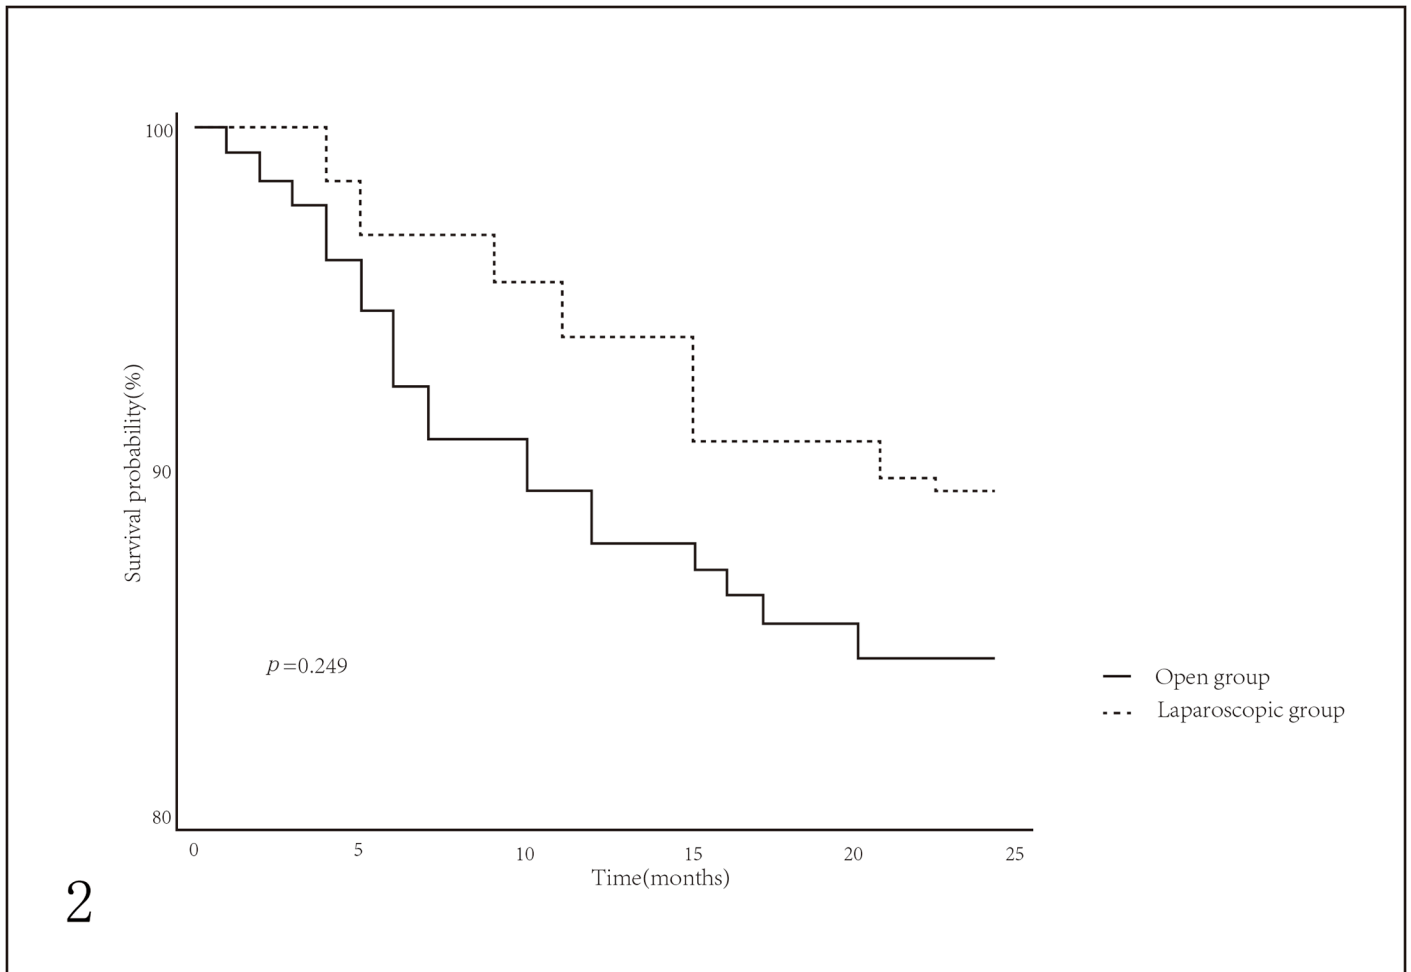

Fig 2. Two-year overall survival (OS) probability of patients in open group and laparoscopic group after propensity score matching.

<https://doi.org/10.1371/journal.pone.0203125.g002>

## Discussion

The prevalence of Siewert-type II/III AGE is increasing rapidly, and most patients are diagnosed at an advanced stage [3,8–9]. Previous retrospective studies and meta-analyses have revealed that patients receiving laparoscopic surgery show reduced blood loss, faster recovery, and fewer post-operative complications but have a significantly longer operation time compared to patients receiving open gastrectomy surgeries. Furthermore, the laparoscopic and open groups showed similar results in lymph node dissection and OS [10–12]. In our study, we also found that laparoscopic gastrectomy required a significantly longer operation time after PSM, which is consistent with previous studies [10–11]. This result is likely attributable to the technical difficulties of laparoscopic gastrectomy, such as sufficient lymph node dissection, complex vasculature structures, and combined resection of other organs. However, as experience grows with laparoscopic procedures, laparoscopic gastrectomy is no longer regarded as limited in its application, but rather has become a controversial approach [13].

According to the Japanese gastric cancer guidelines, total gastrectomy with D2 lymphadenectomy is the standard option for advanced gastric cancers [5]. It was reported that 60% to 70% of proximal gastric cancers are treated with chemotherapy after proximal gastrectomy with

Table 2. Cox regression analyses for unmatched patients: Uni-variable and multi-variable analysis.

|                                 | Uni-variable |        |            |       | Multi-variable |        |       |       |
|---------------------------------|--------------|--------|------------|-------|----------------|--------|-------|-------|
|                                 | HR           | 95% CI |            | P     | HR             | 95% CI |       | P     |
| Gender                          | 0.439        | 0.159  | 1.216      | 0.113 |                |        |       |       |
| Age                             | 0.975        | 0.945  | 1.005      | 0.102 |                |        |       |       |
| Height                          | 1.017        | 0.978  | 1.057      | 0.406 |                |        |       |       |
| Body weight                     | 1.000        | 0.976  | 1.024      | 0.984 |                |        |       |       |
| Body Mass Index                 | 0.984        | 0.908  | 1.067      | 0.696 |                |        |       |       |
| Loss of body weight $\geq 10\%$ | 1.172        | 0.502  | 2.736      | 0.714 |                |        |       |       |
| Smoking history                 | 1.001        | 0.589  | 1.699      | 0.998 |                |        |       |       |
| Drinking history                | 0.590        | 0.279  | 1.248      | 0.167 |                |        |       |       |
| Cardiovascular Disease          | 1.571        | 0.491  | 5.029      | 0.447 |                |        |       |       |
| Diabetes                        | 0.617        | 0.193  | 1.975      | 0.416 |                |        |       |       |
| ECOG score                      | 1.043        | 0.493  | 2.208      | 0.912 |                |        |       |       |
| Neo-adjuvant chemotherapy       | 1.957        | 0.477  | 8.030      | 0.351 |                |        |       |       |
| Surgical approach               |              |        |            |       |                |        |       |       |
| Laparoscopic group              | 1            |        |            | 0.534 |                |        |       | 0.702 |
| Open group                      | 0.764        | 0.327  | 1.783      |       | 0.847          | 0.361  | 1.986 |       |
| UICC stage                      |              |        |            |       |                |        |       |       |
| I                               | 1            |        |            | 0.032 |                |        |       |       |
| II                              | 2.44         | 1.76   | 3.59       | 0.004 |                |        |       |       |
| III                             | 3.69         | 2.13   | 5.37       | 0.045 |                |        |       |       |
| Operation time (min)            | 1.003        | 0.998  | 1.008      | 0.235 |                |        |       |       |
| Loss of blood (ml)              | 1.001        | 1.000  | 1.002      | 0.165 |                |        |       |       |
| lymph node dissection number    | 1.024        | 0.997  | 1.052      | 0.077 |                |        |       |       |
| Combined organ resection        | 2.300        | 1.235  | 4.284      | 0.009 | 2.258          | 1.210  | 4.212 | 0.010 |
| Reconstruction type             |              |        |            |       |                |        |       |       |
| Roux-en-Y                       | 1            |        |            | 0.213 |                |        |       |       |
| Esophagogastrostomy             | 0.553        | 0.285  | 1.070      | 0.079 |                |        |       |       |
| Jejunum interposition           | 0.000        | 0.000  | 2.301E+284 | 0.971 |                |        |       |       |
| Post-operation complications    |              |        |            |       |                |        |       |       |
| Anastomotic leakage             | 0.980        | 0.239  | 4.021      | 0.978 |                |        |       |       |
| Empyema                         | 1.865        | 0.258  | 13.484     | 0.537 |                |        |       |       |
| Abdominal abscess               | 1.223        | 0.298  | 5.019      | 0.780 |                |        |       |       |
| Pneumonia                       | 2.356        | 1.009  | 5.501      | 0.010 | 2.273          | 1.171  | 5.325 | 0.039 |
| Hospital stay                   | 1.006        | 0.991  | 1.021      | 0.460 |                |        |       |       |

<https://doi.org/10.1371/journal.pone.0203125.t002>

esophago-gastrostomy and antrum-preserving signal tract reconstruction [14]. In this study, some patients in both groups underwent proximal gastrectomy and esophagogastrostomy.

The results of our study suggest that blood loss was greater in the open group after PSM, which is probably attributable to the high ratio of combined organ resections and poor vessel exposure in open gastrectomy [15]. Our study showed no significant differences in the number of lymph nodes dissected before PSM or after PSM, which is consistent with previous studies. This result suggests that laparoscopic gastrectomy is safe and acceptable in the short-term [10–11,13,16].

Post-operation complications are also associated with surgical safety [12]. The results of a study by Mikito et al. suggest that laparoscopic gastrectomy is associated with a lower incidence of complications than open gastrectomy. We observed similar results in our study, though there was no significant difference between the two groups. However, we speculate

Table 3. Cox regression analyses for matched patients: Uni-variable and multi-variable analysis.

|                                     | Univariable |        |        |       | Multivariable |        |       |       |
|-------------------------------------|-------------|--------|--------|-------|---------------|--------|-------|-------|
|                                     | HR          | 95% CI |        | P     | HR            | 95% CI |       | P     |
| Gender                              | 0.815       | 0.245  | 2.714  | 0.739 |               |        |       |       |
| Age                                 | 0.983       | 0.942  | 1.026  | 0.443 |               |        |       |       |
| Height                              | 0.988       | 0.934  | 1.044  | 0.659 |               |        |       |       |
| Body weight                         | 0.995       | 0.960  | 1.031  | 0.767 |               |        |       |       |
| Body Mass Index                     | 0.996       | 0.884  | 1.122  | 0.945 |               |        |       |       |
| Loss of body weight $\geq$ 10%      | 0.689       | 0.163  | 2.917  | 0.613 |               |        |       |       |
| Smoking history                     | 1.034       | 0.478  | 2.235  | 0.933 |               |        |       |       |
| Drinking history                    | 0.433       | 0.130  | 1.442  | 0.173 |               |        |       |       |
| Cardiovascular Disease              | 1.884       | 0.445  | 7.974  | 0.389 |               |        |       |       |
| Diabetes                            | 0.979       | 0.231  | 4.144  | 0.977 |               |        |       |       |
| ECOG score                          | 1.410       | 0.486  | 4.091  | 0.528 |               |        |       |       |
| Neo-adjuvant chemotherapy           | 1.777       | 0.241  | 13.114 | 0.573 |               |        |       |       |
| <b>Surgical approach</b>            |             |        |        |       |               |        |       |       |
| Laparoscopic group                  | 1           |        |        | 0.255 |               |        |       | 0.390 |
| Open group                          | 0.589       | 0.236  | 1.466  |       | 0.666         | 0.264  | 1.681 |       |
| <b>UICC stage</b>                   |             |        |        |       |               |        |       |       |
| I                                   | 1           |        |        | 0.069 |               |        |       |       |
| II                                  | 2.09        | 1.17   | 4.52   | 0.011 |               |        |       |       |
| III                                 | 4.01        | 1.97   | 6.12   | 0.027 |               |        |       |       |
| Operation time (min)                | 1.003       | 0.995  | 1.010  | 0.453 |               |        |       |       |
| Loss of blood (ml)                  | 1.001       | 0.999  | 1.002  | 0.310 |               |        |       |       |
| lymph node dissection number        | 1.024       | 0.987  | 1.063  | 0.201 |               |        |       |       |
| Combined organ resection            | 2.461       | 1.070  | 5.661  | 0.024 | 2.293         | 0.985  | 5.339 | 0.046 |
| <b>Reconstruction type</b>          |             |        |        |       |               |        |       |       |
| Roux-en-Y                           | 1           |        |        | 0.378 |               |        |       |       |
| Esophagogastrostomy                 | 0.038       | 0.000  | 3.768  | 0.164 |               |        |       |       |
| Jejunum interposition               |             |        |        |       |               |        |       |       |
| <b>Post-operation complications</b> |             |        |        |       |               |        |       |       |
| Anastomotic leakage                 | 1.943       | 0.459  | 8.220  | 0.367 |               |        |       |       |
| Empyema                             | 2.900       | 0.393  | 21.402 | 0.297 |               |        |       |       |
| Abdominal abscess                   | 2.806       | 0.663  | 11.875 | 0.161 |               |        |       |       |
| Pneumonia                           | 0.048       | 0.000  | 7.125  | 0.621 |               |        |       |       |
| Hospital stay                       | 1.016       | 0.995  | 1.038  | 0.137 |               |        |       |       |

<https://doi.org/10.1371/journal.pone.0203125.t003>

that this may be attributable to the fact that the type of surgery performed was chosen by the patients and not their doctors.

The majority of recurrences or metastases occurred during the first two years after surgery [17]. There was no significant difference in the 2-year Overall survival (OS) rate between the two groups, which means the laparoscopic gastrectomy is safe and feasible for treating Siewert-type II/III AEG. Several retrospective studies and meta-analyses also reported that laparoscopic surgery was as safe as open surgery after a 5-year follow-up period [10–11,13].

PSM was initially proposed as a method for reducing bias in non-randomized control studies [18]. We aimed to reduce heterogeneity by incorporating all clinico-pathological factors into the PSM analysis. The independent prognostic factors for survival were: UICC stage, regardless of combined organ resection in both the unmatched and matched cohorts. The results may be explained by the fact that survival time was mainly determined by the UICCs



[5]. On the other hand, a previous study has demonstrated that Siewert-type III AEG with tumor diameters >4 cm has a high relative frequency of splenic hilar metastasis [19]. Therefore, AEG often combined splenic hilar resection in this study. Additionally, metastases of the No. 10 lymph-node may be associated with a more advanced disease stage and a poor prognosis.

This study has some limitations. First, data were collected retrospectively, introducing some underlying selection bias into the study cohort. Second, surgical approaches were mainly decided by patients and not the doctors. More so, partial patients in both groups underwent proximal gastrectomy and esophagogastrostomy, which are not the best surgical approaches. Additionally, we did not achieve a 5-year follow-up time to evaluate the long-term survival of patients. Finally, other variables such as pathological and biological factors may introduce potential bias into the data.

In conclusion, the laparoscopic gastrectomy was a safe and feasible treatment for Siewert-type II/III AEG. Further prospective studies are necessary to confirm our results.

## Author Contributions

**Data curation:** Yinan Shi, Linjie Li, Kai Tao.

**Formal analysis:** Yinan Shi, Linjie Li.

**Funding acquisition:** Yinan Shi, Linjie Li.

**Investigation:** Yinan Shi, Linjie Li, Kai Tao.

**Methodology:** Linjie Li, Shanshan Guo, Guiping Wang, Liang Zong.

**Project administration:** Guiping Wang, Jianhong Dong.

**Supervision:** Jianhong Dong, Liang Zong.

**Validation:** Huashi Xiao, Shanshan Guo, Jianhong Dong, Liang Zong.

**Visualization:** Jianhong Dong, Liang Zong.

**Writing – original draft:** Huashi Xiao.

## References

1. Jemal A, Bray F, Center MM, Ferlay J, Ward E, Forman D. Global cancer statistics. *CA Cancer J Clin* 2011; 61: 69–90. <https://doi.org/10.3322/caac.20107> PMID: 21296855
2. Devesa SS, Blot WJ, Fraumeni JF Jr. Changing patterns in the incidence of esophageal and gastric carcinoma in the United States. *Cancer* 1998; 83: 2049–53. PMID: 9827707
3. Siewert JR, Feith M, Stein HJ. Biologic and clinical variations of adenocarcinoma at the esophago-gastric junction: relevance of a topographic-anatomic sub-classification. *J Surg Oncol* 2005; 90: 139–46; discussion 146. <https://doi.org/10.1002/jso.20218> PMID: 15895452
4. Kim JP. Current status of surgical treatment of gastric cancer. *J Surg Oncol* 2002; 79: 79–80. PMID: 11815992
5. Zhao Y, Yu P, Hao Y, Qian F, Tang B, Shi Y, et al. Comparison of outcomes for laparoscopically assisted and open radical distal gastrectomy with lymphadenectomy for advanced gastric cancer. *Surg Endosc* 2011; 25: 2960–2966. <https://doi.org/10.1007/s00464-011-1652-y> PMID: 21512884
6. Japanese Gastric Cancer Association. Japanese gastric cancer treatment guidelines 2014 (ver. 4). *Gastric Cancer* (2017) 20:1–19.
7. Haverkamp L., Weijs T. J., van der Sluis P. C., van der Tweel I., Ruurda J. P., van Hillegersberg R. Laparoscopic total gastrectomy versus open total gastrectomy for cancer: a systematic review and meta-analysis. *Surg Endosc* 2013; 27: 1509–1520. <https://doi.org/10.1007/s00464-012-2661-1> PMID: 23263644
8. Hosokawa Y, Kinoshita T, Konishi M, Takahashi S, Gotohda N, Kato Y, et al. Clinicopathological features and prognostic factors of adenocarcinoma of the esophagogastric junction according to Siewert

- classification: experiences at a single institution in Japan. *Ann Surg Oncol* 2012; 19:677–83. <https://doi.org/10.1245/s10434-011-1983-x> PMID: 21822549
9. Liu K, Zhang W, Chen X, Chen X, Yang K, Zhang B, et al. Comparison on Clinicopathological Features and Prognosis Between EsophagogastricJunctional Adenocarcinoma (Siewert II/III Types) and Distal Gastric Adenocarcinoma: Retrospective Cohort Study, a Single Institution, High Volume Experience in China. *Medicine (Baltimore)*. 2015 Aug; 94(34):e1386.
  10. Xiong Jun-Jie, Quentin M Nunes Wei Huang, Tan Chun-Lu, Ke Neng-Wen, Xie Si-Ming, et al. Laparoscopic vs open total gastrectomy for gastric cancer: A meta-analysis. *World J Gastroenterol*. 2013 Nov 28; 19(44): 8114–8132. <https://doi.org/10.3748/wjg.v19.i44.8114> PMID: 24307808
  11. Wang Weizhi, Zhang Xiaoyu, Shen Chen, Zhi Xiaofei, Wang Baolin, Xu Zekuan. Laparoscopic versus Open Total Gastrectomy for Gastric Cancer: An Updated Meta-Analysis. *PLOS ONE*. 2014 Feb; 9(2): e88753. <https://doi.org/10.1371/journal.pone.0088753> PMID: 24558421
  12. Inokuchi Mikito, Otsuki Sho, Ogawa Norihito, Tanioka Toshiro, Okuno Keisuke, Gokita Kentaro, et al. Postoperative Complications of Laparoscopic Total Gastrectomy versus Open Total Gastrectomy for Gastric Cancer in a Meta-Analysis of High-Quality Case-Controlled Studies. *Gastroenterol Res Pract*. 2016; 2016: 2617903. <https://doi.org/10.1155/2016/2617903> PMID: 28042292
  13. Eom BW, Kim YW, Lee SE, Ryu KW, Lee JH, Yoon HM, et al. Survival and surgical outcomes after laparoscopy-assisted total gastrectomy for gastric cancer: case-control study. *Surg Endosc* 2012; 26: 3273–3281. <https://doi.org/10.1007/s00464-012-2338-9> PMID: 22648107
  14. Xiao Jiang-Wei, Liu Zi-Lin, Ye Peng-Cheng, Luo Ya-Jun, Fu Zhi-Ming, Zou Qin, et al. Clinical comparison of antrum-preserving double tract reconstruction vs roux-en-Y reconstruction after gastrectomy for Siewert types II and III adenocarcinoma of the esophagogastric junction. *World J Gastroenterol*. 2015 14; 21(34): 9999–10007. <https://doi.org/10.3748/wjg.v21.i34.9999> PMID: 26379405
  15. Ohtani H, Tamamori Y, Noguchi K, Azuma T, Fujimoto S, Oba H, et al. A meta-analysis of randomized controlled trials that compared laparoscopy-assisted and open distal gastrectomy for early gastric cancer. *J Gastrointest Surg* 2010; 14(6): 958–964. <https://doi.org/10.1007/s11605-010-1195-x> PMID: 20354807
  16. Straatman Jennifer, van der Wielen Nicole, Cuesta Miguel A., de Lange-de Klerk Elly S. M., Jansma Elise P., van der Peet Donald L. Minimally Invasive Versus Open Total Gastrectomy for Gastric Cancer: A Systematic Review and Meta-analysis of Short-Term Outcomes and Completeness of Resection: Surgical Techniques in Gastric Cancer. *World J Surg* (2016) 40:148–157. <https://doi.org/10.1007/s00268-015-3223-1> PMID: 26350821
  17. McCulloch P (2006) The role of surgery in patients with advanced gastric cancer. *Best Pract Res Clin Gastroenterol* 20: 767–787. <https://doi.org/10.1016/j.bpg.2006.03.006> PMID: 16997159
  18. Rosenbaum PR, Rubin DB. The central role of propensity score in observational studies for causal effects. *Biometrika* 1983; 70:41–55.
  19. Lv Chen-Bin, Huang Chang-Ming, Zheng Chao-Hui, Li Ping, Xie Jian-Wei, Wang Jia-Bin, et al. Should Splenic Hilar Lymph Nodes be Dissected for Siewert Type II and III Esophagogastric Junction Carcinoma Based on Tumor Diameter? *Medicine (Baltimore)*. 2016 May; 95(21): e3473.
